# Supplementary material for: SPION-decorated organofunctionalized MCM48 silica-based nanocomposites for magnetic solid-phase extraction
Source: Royal Society of Chemistry journal article supplement (doi:10.1039/d0ma00989j), 2021-01-01
Supplement: d0ma00989j1.pdf [file d0ma00989j1.pdf]

## SPIONs decorated organofunctionalized MCM48 silica-based nanocomposites for magnetic solid phase extraction

Daniel Garcia Osorio<sup>a</sup>, Helton P. Nogueira<sup>a</sup>, Josué M. Goncalves<sup>a</sup>, Sergio H. Toma<sup>a</sup>, Sergi Garcia-Segura<sup>c</sup>, Koiti Araki<sup>a,\*</sup>

### Supplementary Material

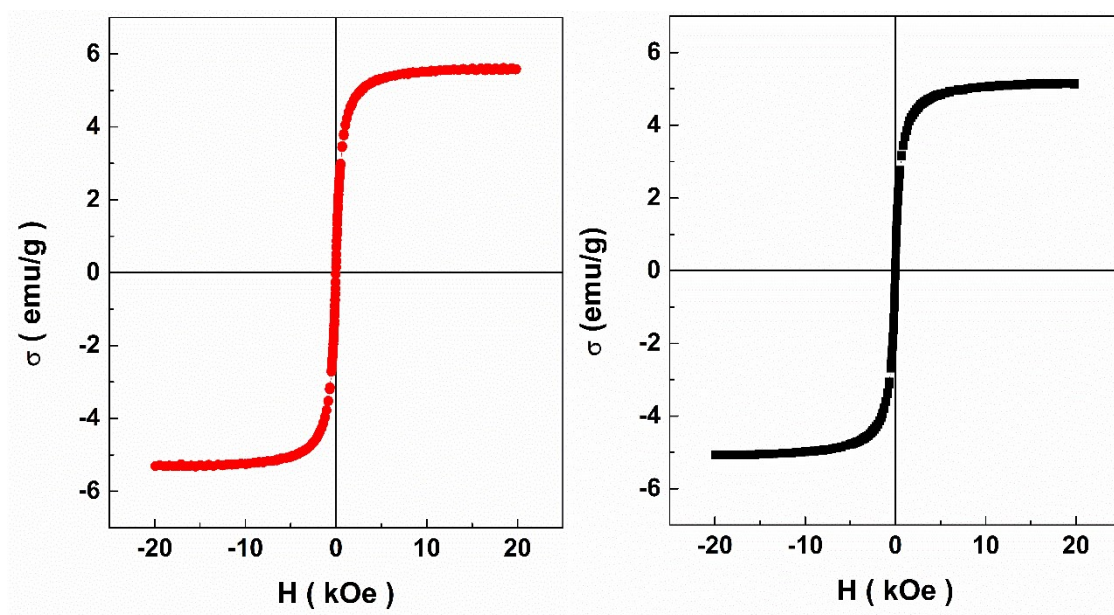

Fig. S1: Magnetic hysteresis curves for MCM48/SPION/C8 (left) and Silica/SPION/C8 (right).

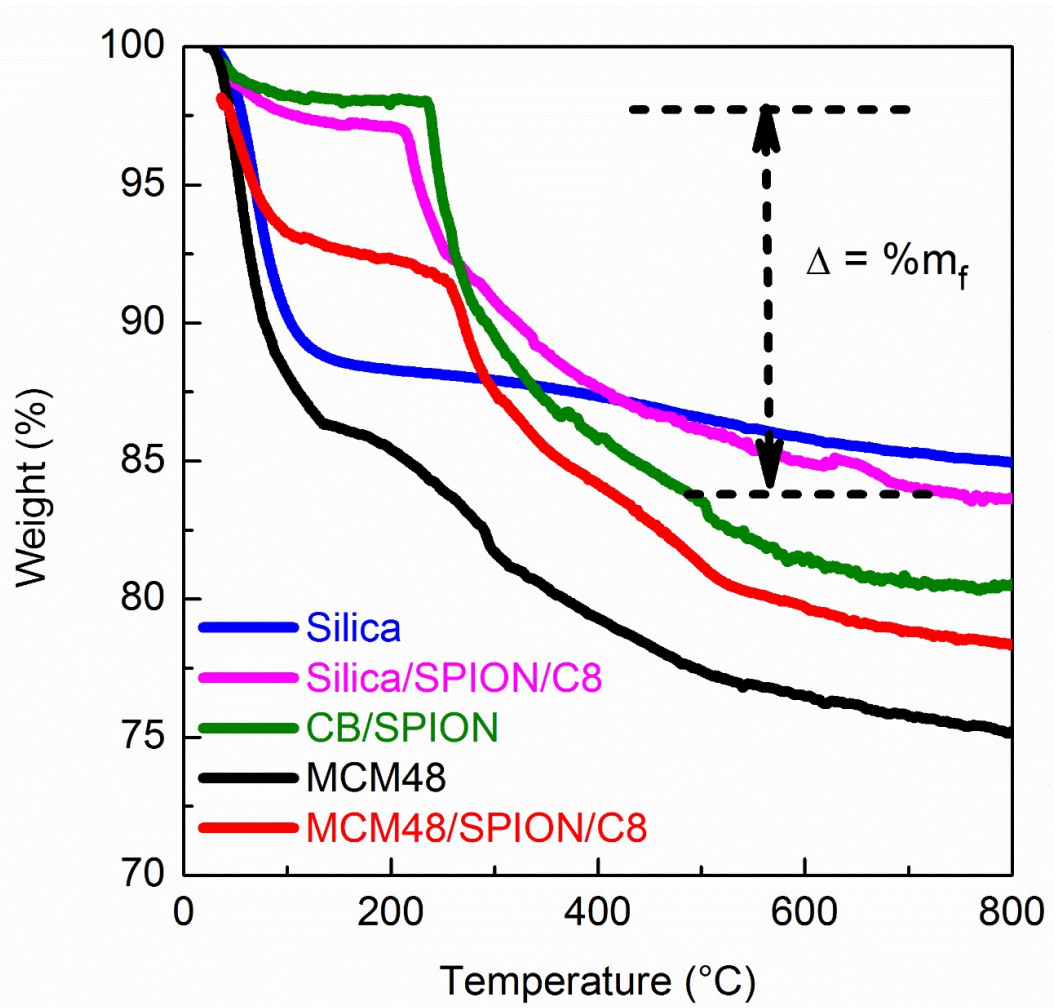

Fig. S2: Thermogravimetric Analysis of the prepared silica and MCM48-based materials.

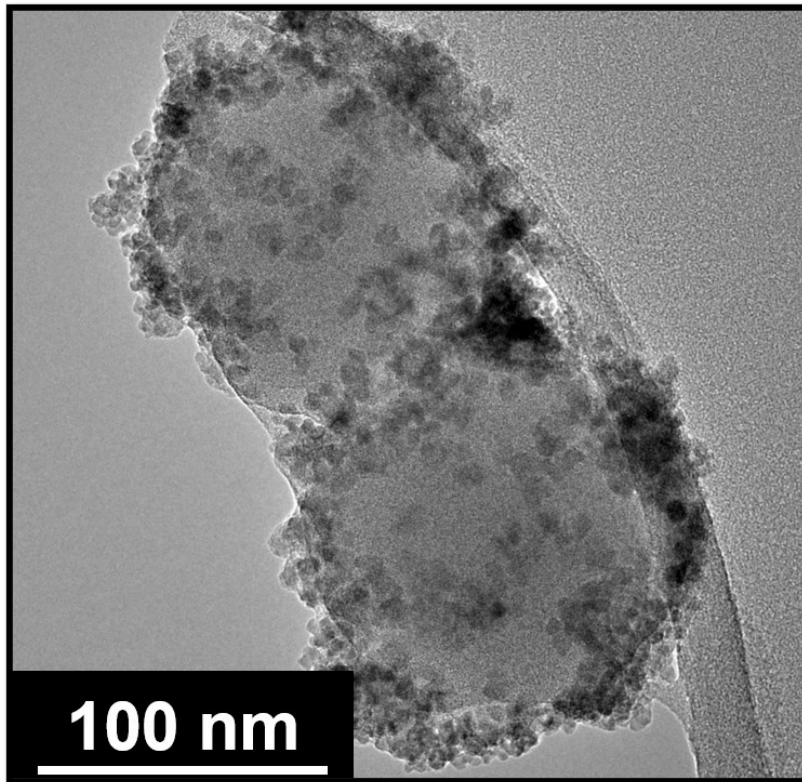

Fig. S3: MCM48/SPION/C8 HRTEM Image.

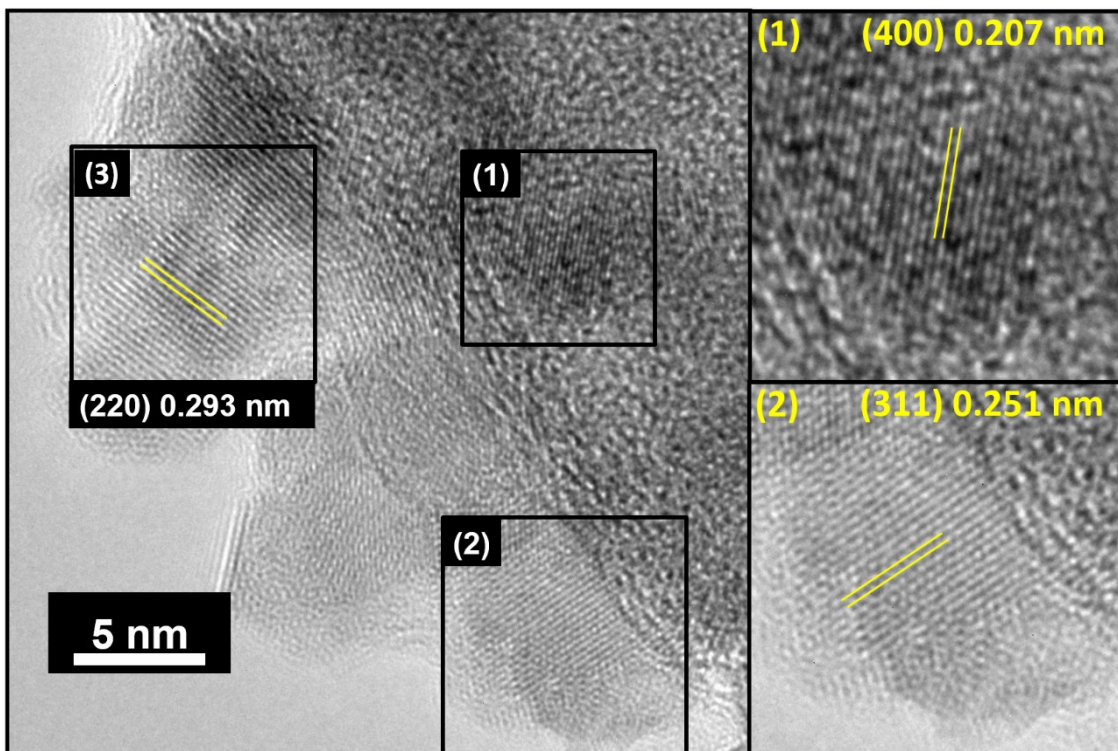

Fig. S4: MCM48/SPION/C8 HRTEM image evidencing the magnetite crystallographic plans.



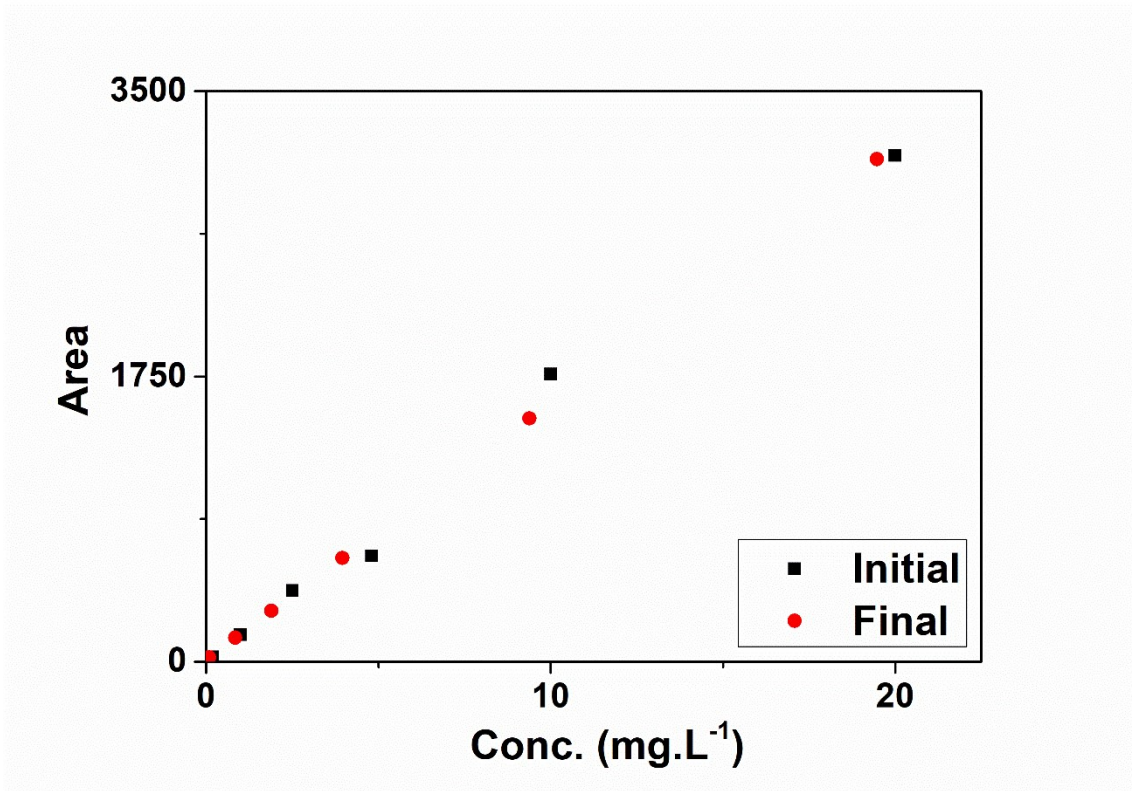

Fig. S5: Benzene GC-MS integral area as a function of concentration before and after one cycle of adsorption/desorption assay.
